# Supplementary material
Source: Springer Nature journal article supplement (https://www.springermedizin.de/resource/supplementary/13000_2013_790_MOESM3_ESM.pdf/9625076)

M

A

B

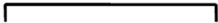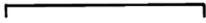

-

+

-

+

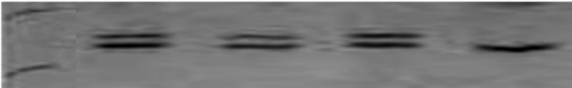

Supplement: MOESM3 [file 9625076]
